# Supplementary material for: Bright structural coloration from organic polymeric photonic crystals with robust heat-resistance
Source: Royal Society of Chemistry journal article supplement (doi:10.1039/c7tc03461j), 2017-01-01
Supplement: c7tc03461j1.pdf [file c7tc03461j1.pdf]

## Supporting Information

### **Bright Structural Coloration from Organic Polymeric Photonic Crystal with Robust Heat-Resistance**

*Feihu Li,<sup>a</sup> Bingtao Tang,<sup>\*a</sup> Suli Wu,<sup>a</sup> Wei Ma<sup>a</sup> and Shufen Zhang<sup>a</sup>*

<sup>a</sup> State Key Laboratory of Fine Chemicals, Dalian University of Technology, Dalian 116024, China \*E-mail: tangbt@dlut.edu.cn

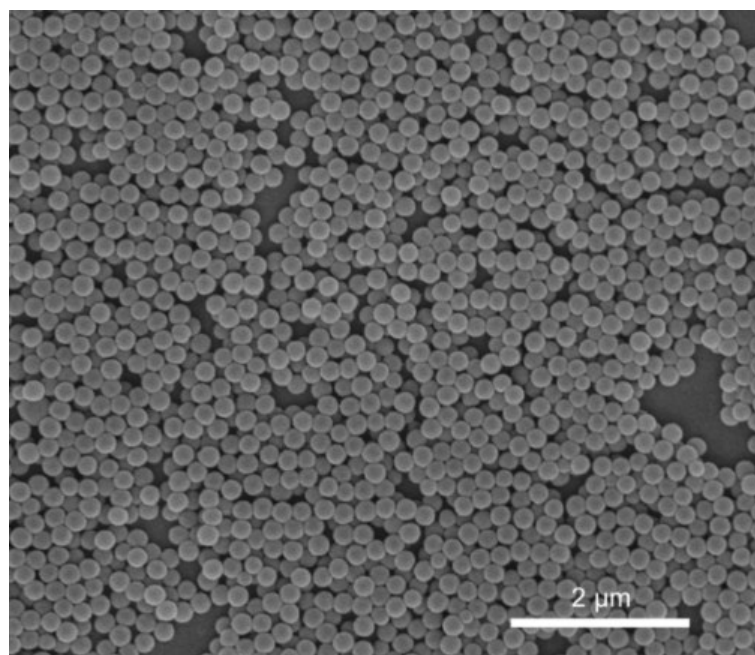

**Fig. S1** Typical large-scale SEM image of TPF spheres synthesized using 0.225 g of 4,4'-Thiodiphenol, 0.225 mL of formaldehyde, 0.05 g of F127, and 0.3 mL of TEA, 20 mL of ethanol, 50 mL of water and undergoing 150 °C of hydrothermal process for 12 h.

**Table S1** Synthesis parameters and corresponding properties of TPF microspheres synthesized at different monomer concentration.

| Sample | Thiodiphenol<br>(g) | Formaldehyde<br>(mL) | TEA<br>(mL) | Size (nm)       |                 | PDI <sup>3</sup> | ZP <sup>4</sup><br>(mV) |
|--------|---------------------|----------------------|-------------|-----------------|-----------------|------------------|-------------------------|
|        |                     |                      |             | Da <sup>1</sup> | Dh <sup>2</sup> |                  |                         |
| 1      | 0.125               | 0.125                | 0.3         | 142             | 161.7           | 0.002            | -34.9                   |
| 2      | 0.175               | 0.175                | 0.3         | 168             | 196.1           | 0.017            | -35.4                   |
| 3      | 0.225               | 0.225                | 0.3         | 231             | 256.5           | 0.003            | -33.5                   |
| 4      | 0.275               | 0.275                | 0.3         | 285             | 313.0           | 0.021            | -34.1                   |
| 5      | 0.300               | 0.300                | 0.3         | 337             | 361.2           | 0.029            | -31.8                   |

1 Da: Average particle diameter calculated on the base of counting 200 individual particles in the SEM images. 2 Dh: Hydrodynamic particle size of corresponding TPF spheres measured by DLS. 3 PDI: Particle size distribution index. 4 ZP: Zeta potential. Other parameters: 50 mL water, 20 mL ethanol, 0.05 g F-127.

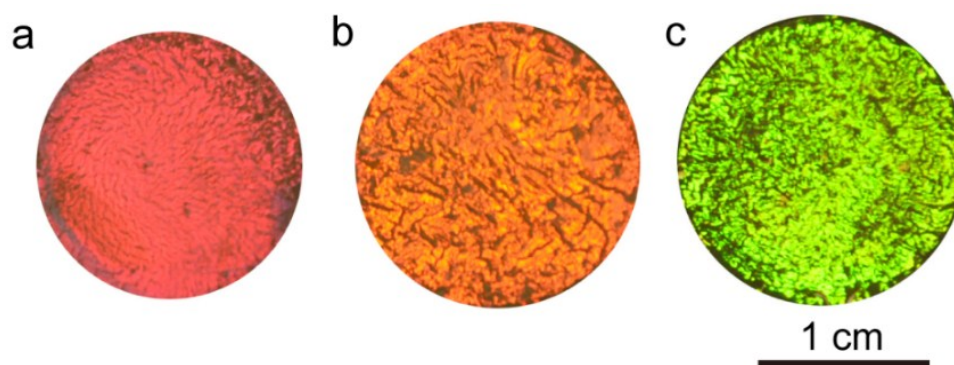

**Fig. S2** Digital photographs of red, orange and green structural color films self-assembled from TPF microspheres with different particle sizes: a) 278 nm, b) 265 nm, and c) 231 nm.

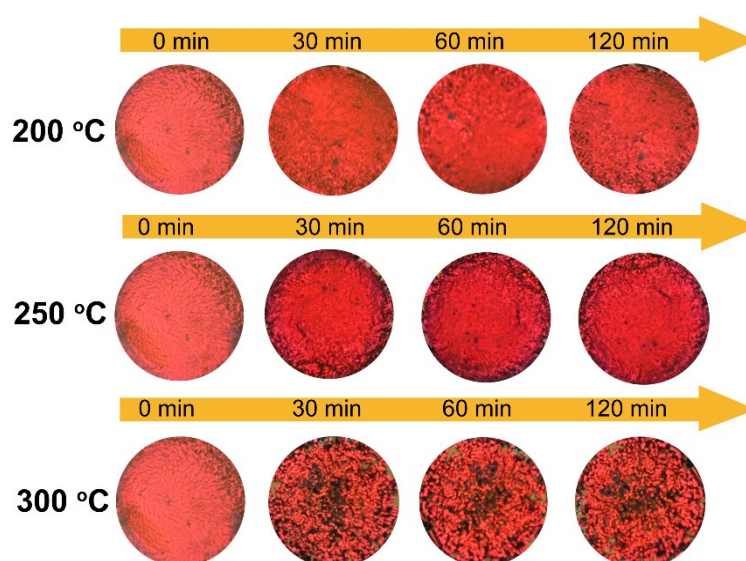

**Fig. S3** Digital photographs of the red TPF structural color films heat-treated at different temperature and time.

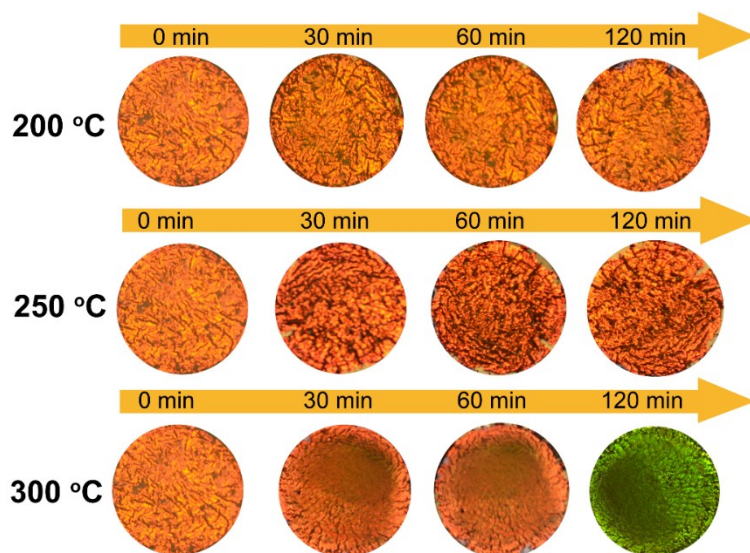

**Fig. S4** Digital photographs of the orange TPF structural color films heat-treated at different temperature and time.

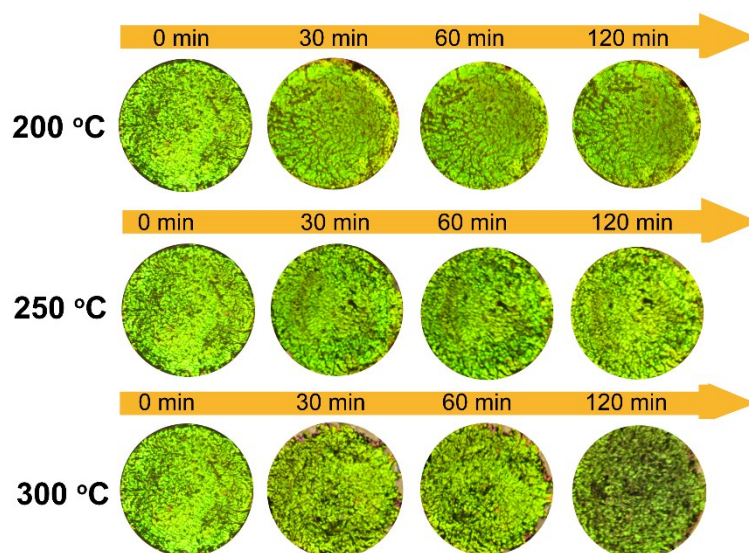

**Fig. S5** Digital photographs of the green TPF structural color films heat-treated at different temperature and time.

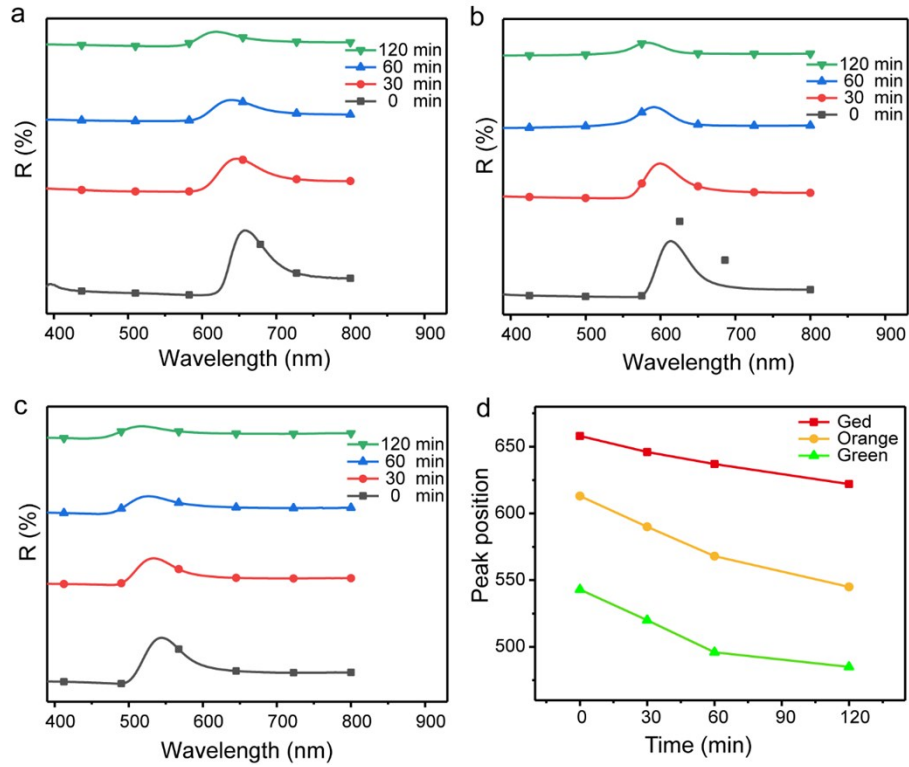

**Fig. S6** a)-c) Reflectance spectra of three TPF structural color films heat-treated at 300 °C for different time: a) red b) orange and c) green; d) Peak position curve as a function of the heat-treatment time.

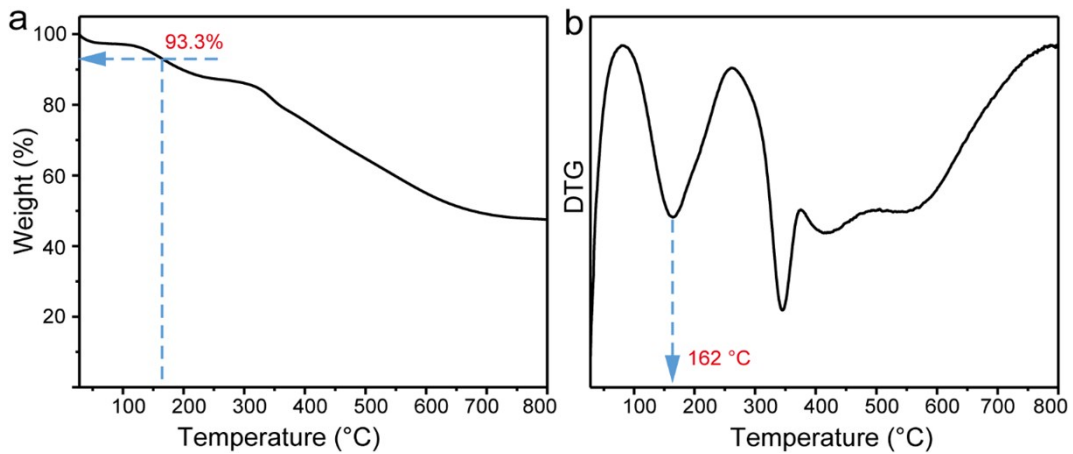

**Fig. S7** a) TGA curve of the TPF microspheres sample, b) Corresponding DTG curve.
